# Supplementary material
Source: Springer Nature journal article supplement (https://www.springermedizin.de/resource/supplementary/12891_2010_980_MOESM3_ESM.pdf/9506846)

Women

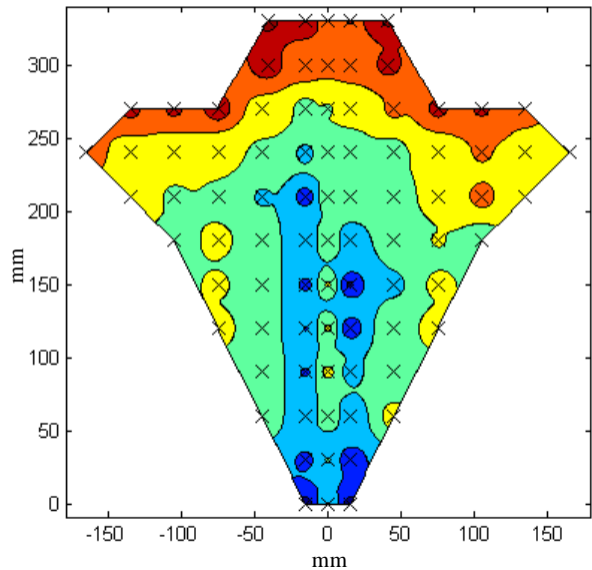

Men

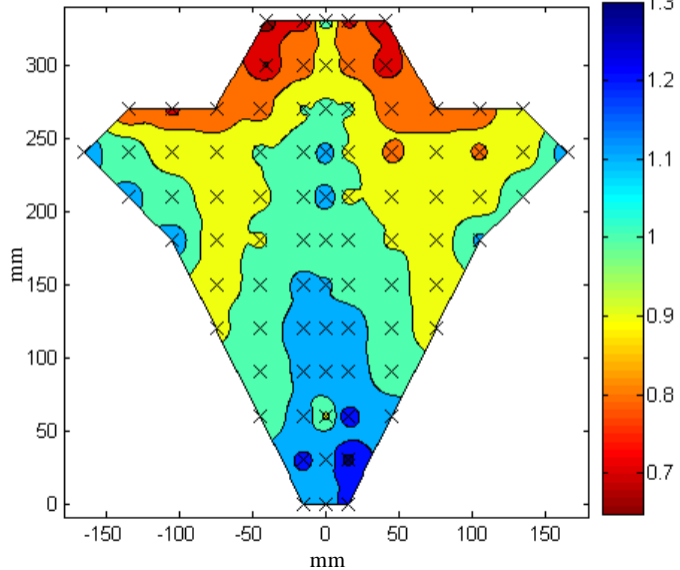

PPT

1.3  
1.2  
1.1  
1  
0.9  
0.8  
0.7

Supplement: MOESM3 [file 9506846]
